# Supplementary material for: Novel photoluminescent chiral liquid crystalline oligomers containing lanthanide ions
Source: Royal Society of Chemistry journal article supplement (doi:10.1039/c5ra15655f), 2015-01-01
Supplement: c5ra15655f1.pdf [file c5ra15655f1.pdf]

## Supporting Information

### Novel photoluminescent chiral liquid crystalline oligomers containing lanthanide ions

Bing Yao, Yuehua Cong, Baoyan Zhang\*

#### 2.3.1. Cholesteryl 4-(allyloxy)benzoate ( $M_1$ ).

$M_1$  was prepared according to previously reported synthesis method.<sup>28</sup> Yield: 76%. IR (KBr): 3070  $\text{cm}^{-1}$  (=CH), 2974, 2856  $\text{cm}^{-1}$  ( $-\text{CH}_3$ ,  $-\text{CH}_2-$ ), 1706  $\text{cm}^{-1}$  (C=O), 1642  $\text{cm}^{-1}$  (C=C), 1604, 1498  $\text{cm}^{-1}$  (Ar-), 1274, 1172  $\text{cm}^{-1}$  (C-O-C). Found: C, 81.18, H, 9.87%. Calc. for  $\text{C}_{37}\text{H}_{54}\text{O}_3$ : C, 81.27, H, 9.95%.  $^1\text{H}$  NMR (600 MHz,  $\text{CDCl}_3$ ,  $\delta$ ): 7.99–7.98 (d,  $J=9$  Hz, 2H, Ar-H), 6.92 (d,  $J=9$  Hz, 2H, Ar-H), 6.05 (m, 1H,  $\text{CH}_2=\text{CH}-$ ), 5.44–5.41 (t, 2H,  $\text{CH}_2=\text{CH}-$ ), 5.32–5.31 (m, 1H, =CH-in cholesteryl), 4.59–4.58 (d,  $J=4.8$  Hz, 2H,  $-\text{CH}_2\text{O}-$ ), 2.03–0.67 (m, 44H, cholesteryl-H).

#### 2.3.2. 4-(((6-((4'-((4-(allyloxy)benzoyl)oxy)-[1,1'-biphenyl]-4-yl)oxy)-6-oxohexanoyl)oxy)hexahydrofuro[3,2-b]furan-3-yl)oxy)carbonyl)benzoic acid ( $M_2$ ).

The intermediate 6-((4'-((4-(allyloxy) benzoyl)oxy)-[1,1'-biphenyl]-4-yl)oxy)-6-oxohexanoic acid (1) was synthesized via previously published method.<sup>29</sup> Sulfoxide chloride (20 ml) was added to compound (1) (18.98 g, 0.04 mol) at room temperature. The reaction mixture was stirred at room temperature for 2h and then 55 °C for 8 h. Vacuum distillation to remove excess of sulfoxide chloride and obtain the compound (2). Isosorbide (11.69 g, 0.08 mol) was dissolved in 100 ml THF and 6 ml Py at room temperature to obtain the solution. Compound 2 was dissolved in 150 ml THF and

then added dropwise to the solution at room temperature. The reaction mixture was stirred at 40 °C for 12 h. The mixture was poured into 1,000 ml cold water. The precipitated crude product was filtered, boiled in water and recrystallized in alcohol, isolated by filtration, and dried at 45 °C in a vacuum oven to obtain white compound (3) of 4'-((4-(allyloxy)benzoyl)oxy)-[1,1'-biphenyl]-4-yl(6-hydroxyhexahydrofuro[3,2-b]furan-3-yl)adipate. Yield: 68 %. IR (KBr): 3053  $\text{cm}^{-1}$  (=CH), 2940, 2869  $\text{cm}^{-1}$  ( $-\text{CH}_3$ ,  $-\text{CH}_2-$ ), 1757, 1743, 1728  $\text{cm}^{-1}$  (C=O), 1650  $\text{cm}^{-1}$  (C=C), 1606, 1496  $\text{cm}^{-1}$  (Ar-). Found: C, 67.64, H, 5.65%. Calc. for  $\text{C}_{34}\text{H}_{34}\text{O}_{10}$ : C, 67.76, H, 5.69%. Terephthalic acid (5.32 g, 0.032 mol), DCC (4.95 g, 0.024 mol) and DMAP (0.48 g, 3.93 mmol) were dissolved in 150 ml THF at room temperature and stirred for 2 h to obtain the suspension liquid. Compound (3) (9.64 g, 0.016 mol) was dissolved in 80 ml THF at room temperature and then added dropwise to the suspension liquid at room temperature. The reaction mixture was stirred at room temperature for 48 h. After that, 0.15 ml water was added to the mixture at room temperature. After 2 h, the mixture was filtered and poured into 1000 ml cold water. The precipitated crude product was filtered, washed with 2% NaOH solution several times and boiled in THF, isolated by filtration, and dried at 45 °C in a vacuum oven to obtain white products  $\text{M}_2$ . Yield: 56%. IR (KBr): 3068  $\text{cm}^{-1}$  (=CH), 2945, 2855  $\text{cm}^{-1}$  ( $-\text{CH}_3$ ,  $-\text{CH}_2-$ ), 1741, 1723, 1688  $\text{cm}^{-1}$  (C=O), 3200–2500  $\text{cm}^{-1}$  ( $-\text{OH}$ ), 1649  $\text{cm}^{-1}$  (C=C), 1604, 1492  $\text{cm}^{-1}$  (Ar-). Found: C, 67.06, H, 5.14%. Calc. for  $\text{C}_{42}\text{H}_{38}\text{O}_{13}$ : C, 67.19, H, 5.10%.  $^1\text{H}$ NMR (600 MHz,  $\text{CDCl}_3$ ,  $\delta$ ): 8.17–7.00 (m, 16H, Ar-H), 6.10–6.04 (m, 1H,  $\text{CH}_2=\text{CH}-$ ), 5.47–5.33 (m, 2H,  $\text{CH}_2=\text{CH}-$ ), 5.23–3.83 (m, 10H,  $-\text{CH}_2-\text{O}-$  and  $-\text{CH}-\text{O}-$ ), 2.62–2.40 (m, 4H, -

$\text{OOCCH}_2(\text{CH}_2)_2\text{CH}_2\text{COO}^-$ , 1.82–1.77 (m, 4H,  $-\text{OOCCH}_2(\text{CH}_2)_2\text{CH}_2\text{COO}^-$ ).

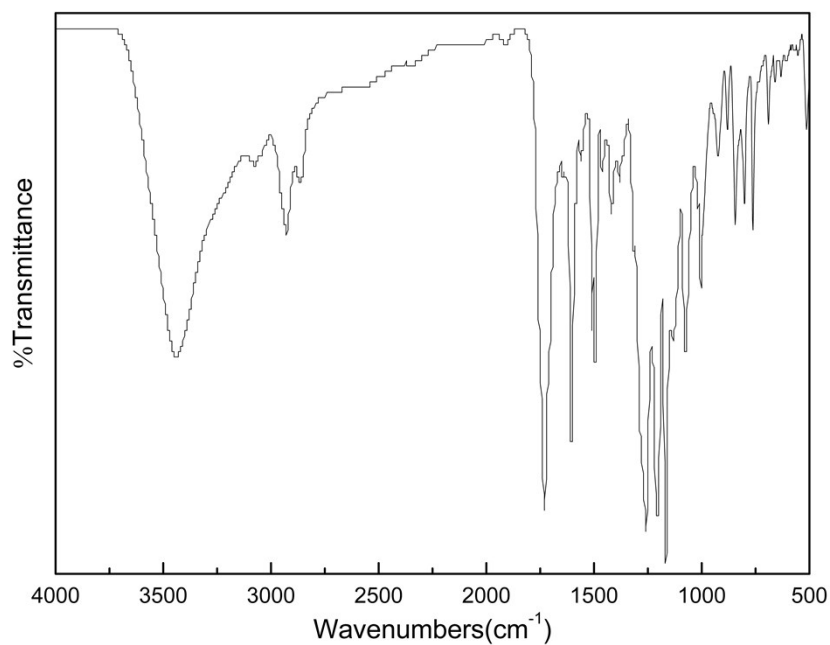

Figure S1. FT-IR spectrogram of compound(3)

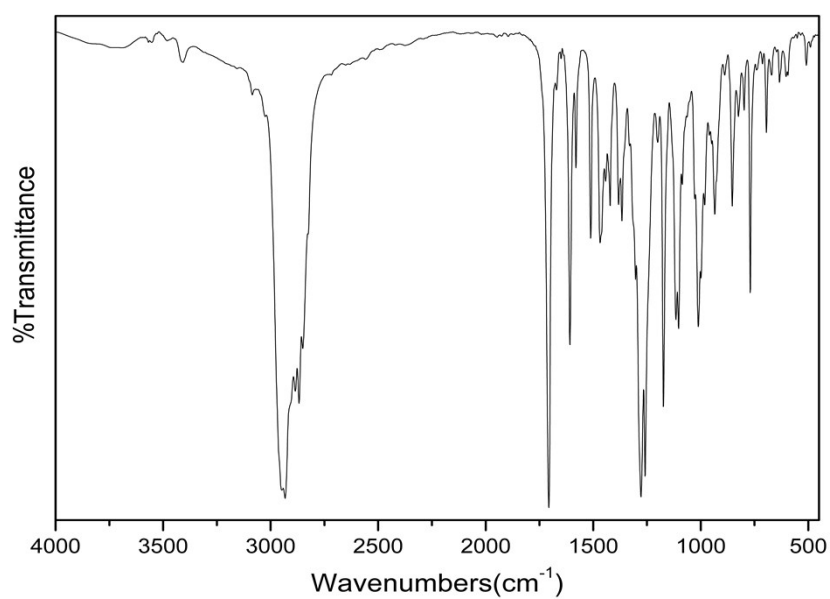

Figure S2. FT-IR spectrogram of  $M_1$

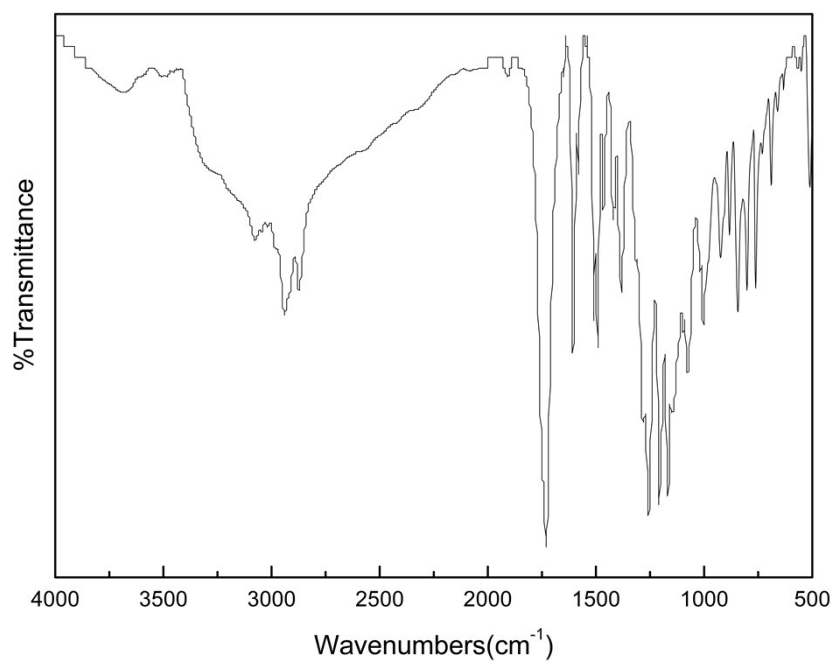

Figure S3. FT-IR spectrogram of M<sub>2</sub>

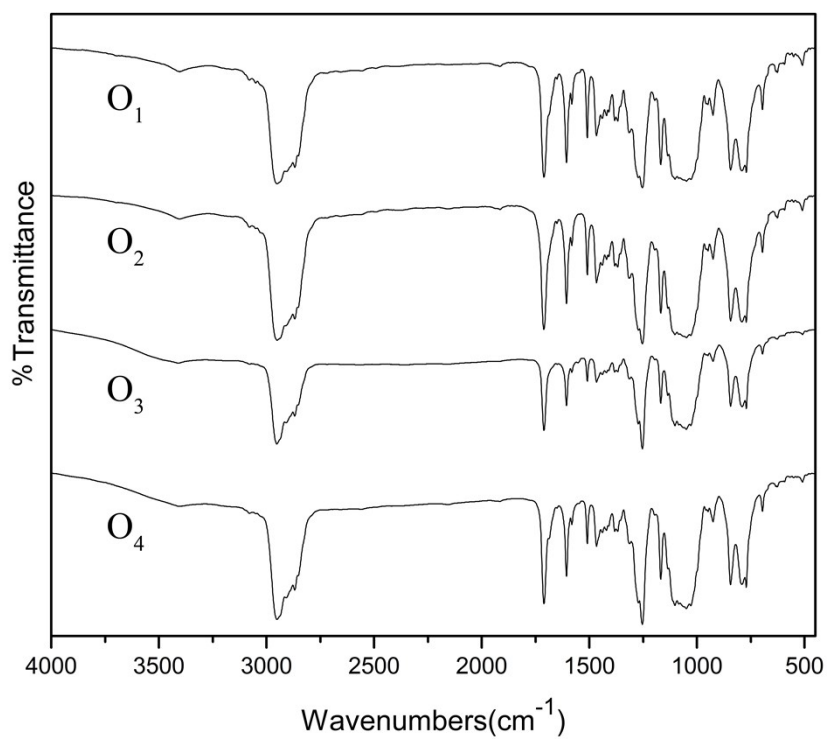

Figure S4. FT-IR spectrogram of LCOs

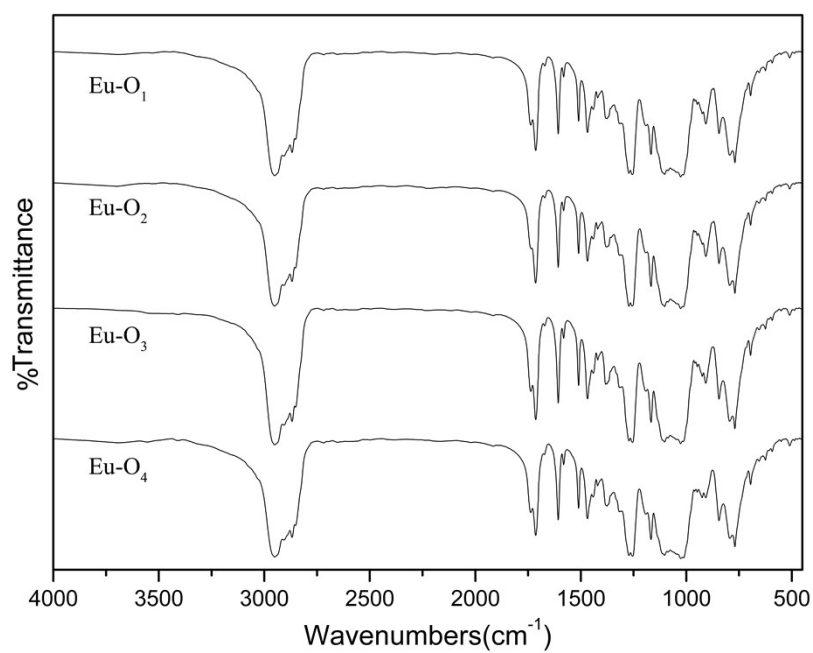

Figure S5. FT-IR spectrogram of **Eu-LCOs**

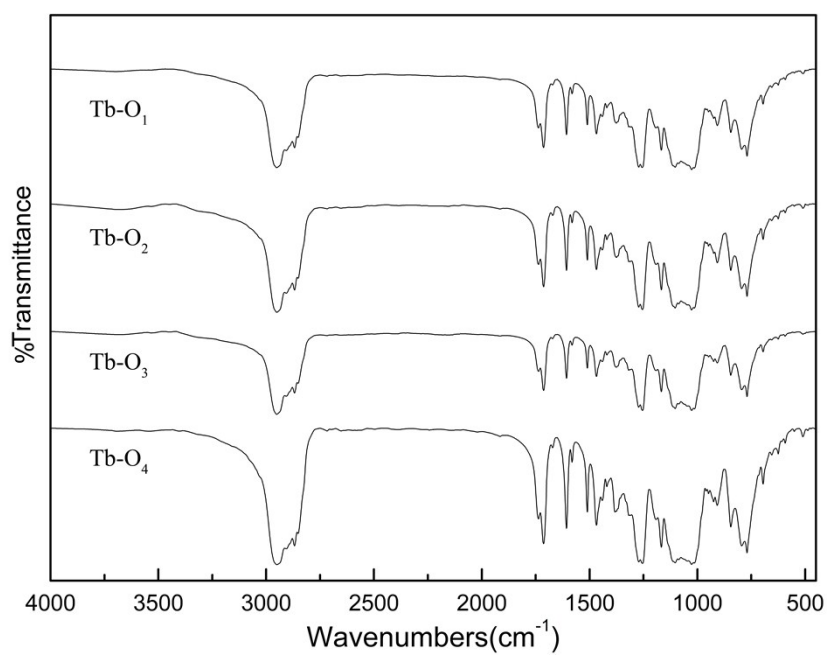

Figure S6. FT-IR spectrogram of **Tb-LCOs**

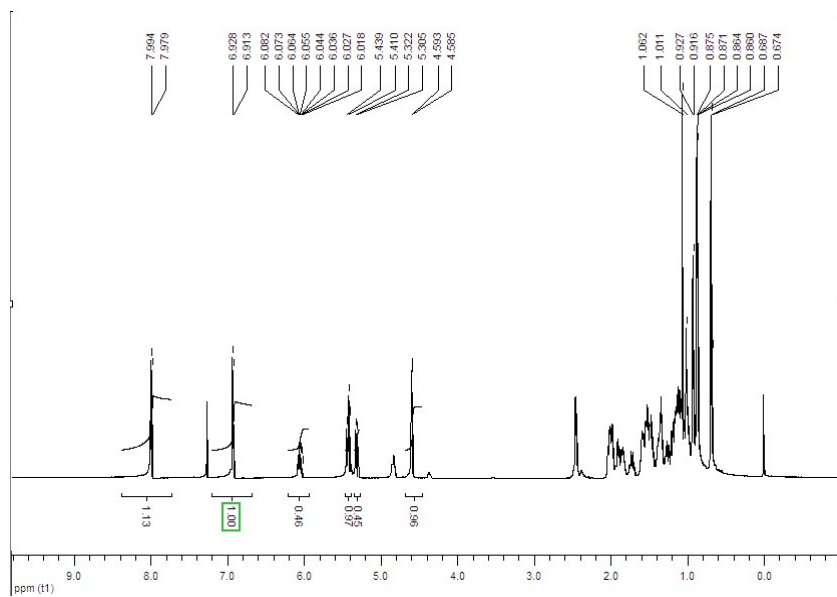

Figure S7.  $^1\text{H}$  NMR spectrum of  $\text{M}_1$  (600 MHz,  $\text{CDCl}_3$ ).

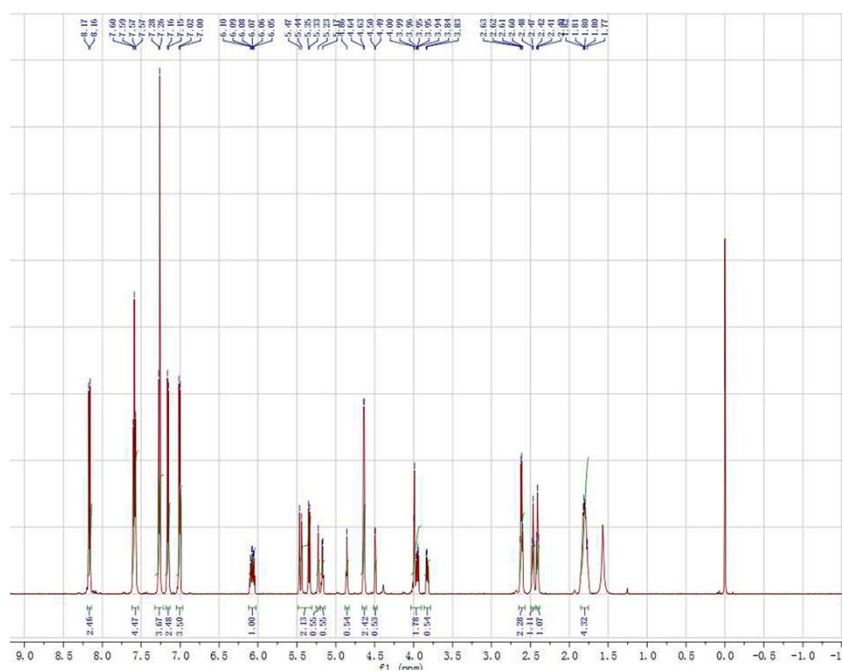

Figure S8.  $^1\text{H}$  NMR spectrum of  $\text{M}_2$  (600 MHz,  $\text{CDCl}_3$ ).

Table 4 Specific rotations of M<sub>1</sub>, M<sub>2</sub> and oligomers

| Sample            | Concentration<br>(g/L) | solvent | reference<br>fluid | Specific<br>rotations |
|-------------------|------------------------|---------|--------------------|-----------------------|
| O <sub>1</sub>    | 0.2                    | TOL     | TOL                | -7.36                 |
| O <sub>2</sub>    | 0.2                    | TOL     | TOL                | -5.84                 |
| O <sub>3</sub>    | 0.2                    | TOL     | TOL                | -4.28                 |
| O <sub>4</sub>    | 0.2                    | TOL     | TOL                | -3.06                 |
| Tb-O <sub>1</sub> | 0.2                    | TOL     | TOL                | -7.29                 |
| Tb-O <sub>2</sub> | 0.2                    | TOL     | TOL                | -5.78                 |
| Tb-O <sub>3</sub> | 0.2                    | TOL     | TOL                | -4.21                 |
| Tb-O <sub>4</sub> | 0.2                    | TOL     | TOL                | -2.97                 |
| Eu-O <sub>1</sub> | 0.2                    | TOL     | TOL                | -7.31                 |
| Eu-O <sub>2</sub> | 0.2                    | TOL     | TOL                | -5.76                 |
| Eu-O <sub>3</sub> | 0.2                    | TOL     | TOL                | -4.24                 |
| Eu-O <sub>4</sub> | 0.2                    | TOL     | TOL                | -2.99                 |
| M <sub>1</sub>    | 0.2                    | TOL     | TOL                | -5.40                 |
| M <sub>2</sub>    | 0.2                    | TOL     | TOL                | +12.63                |

## References

- 28 J. S. Hu, B. Y. Zhang, Y. Guan, X. Z. He, *J. Polym. Sci. Pol. Chem.*, 2004, 42, 5262–5270.
- 29 F. B. Meng, X. D. Zhang, X. Z. He, H. Lu, Y. Ma, H. L. Han and B. Y. Zhang, *Polymer*, 2011, 52, 5075–5084.
- 30 J. S. Hu, B. Y. Zhang, Y. G. Jia, S. Chen, *Macromolecules*, 2003, 36, 9060–9066.
- 31 H. Ogawa, E. Stibal-Fischer, H. Finkelmann, *Macromol. Chem. Phys.*, 2004, 205, 593–599.
